# Supplementary material for: The Effect of Information Communication Technology Interventions on Reducing Social Isolation in the Elderly: A Systematic Review
Source: PubMed Central journal article supplement (PMC4751336; doi:10.2196/jmir.4596), 2016-01-28
Supplement: jmir_v18i1e18_app1.pdf [file jmir_v18i1e18_app1.pdf]

| Study (year)               | Research design                  | Intervention (ICT description)                                                 | Intervention usage                                                                   | Dependent variables                                              | Outcomes measures                                                                                                              | ICT Impacts on outcomes and effect sizes                                                                                                                                                                                                                        | EPHPP rating |
|----------------------------|----------------------------------|--------------------------------------------------------------------------------|--------------------------------------------------------------------------------------|------------------------------------------------------------------|--------------------------------------------------------------------------------------------------------------------------------|-----------------------------------------------------------------------------------------------------------------------------------------------------------------------------------------------------------------------------------------------------------------|--------------|
| Aarts et al. (2014)        | Cross-sectional study            | Social networking sites (SNS)                                                  | Unrestricted                                                                         | Loneliness (emotional, social, & in general)                     | 6-item de Jong-Gierveld Loneliness Scale (2006)                                                                                | SNS usage was unrelated to emotional loneliness, social loneliness, & loneliness in general                                                                                                                                                                     | Weak         |
| Blažun et al. (2012)       | Cohort study w/o a control group | Computer, 3 weeks of group training (12 hours in Finland, 9 hours in Slovenia) | Unrestricted                                                                         | Loneliness                                                       | Self-reporting items by the elderly participants                                                                               | The elderly who do not use Skype to communicate with friends and send up to 5 emails per week had a decreased level of loneliness                                                                                                                               | Weak         |
| Cattan et al. (2011)       | In-depth interview               | Telephone befriending service, no training provided                            | Unrestricted                                                                         | Social isolation, loneliness, depression                         | NA                                                                                                                             | Reduction of social isolation, loneliness, depression, and anxiety; improved state of mind, contentment with life, confidence level, and physical health (less pain)                                                                                            | NA           |
| Clark (2002)               | In-depth interview               | Internet-at-home                                                               | Unrestricted (reported average use: 26hrs/week on computer & 27hrs/week on Internet) | Loneliness                                                       | NA                                                                                                                             | Reduced loneliness (70% of the participants reported it)                                                                                                                                                                                                        | NA           |
| Cotten et al. (2013)       | RCT                              | Internet-at-home, 8 weeks of training (training format not specified)          | Unrestricted (reported average use: 1.3 times/month)                                 | Social isolation, loneliness, social network, social interaction | Self-developed social isolation scale with 3 items, UCLALS (3 items), 7 questions for the quality of online social interaction | Decreased loneliness ( $\beta = .172, P = .001$ ); less isolated ( $\beta = .491, P < .001$ ); more connected ( $\beta = .392, P = .001$ ); earlier to make new contacts ( $\beta = .297, P = .01$ ); better communication quality ( $\beta = .289, P = .010$ ) | Moderate     |
| Delello & McWhorter (2015) | Cohort study w/o a control group | iPad, 3 group training of 1.5-hour lessons over 6 weeks                        | Unrestricted                                                                         | Social connectedness                                             | NA                                                                                                                             | iPad training increased its use by the elderly that further fostered their connection with family, online community, and existing friends                                                                                                                       | Weak         |

Note. n.d. = not documented, NA = not applicable.

| Study (year)                | Research design                | Intervention (ICT description)                                                          | Intervention usage                                   | Dependent variables                                      | Outcomes measures                                                                    | ICT Impacts on outcomes and effect sizes                                                                                                                                                                                           | EPHPP rating |
|-----------------------------|--------------------------------|-----------------------------------------------------------------------------------------|------------------------------------------------------|----------------------------------------------------------|--------------------------------------------------------------------------------------|------------------------------------------------------------------------------------------------------------------------------------------------------------------------------------------------------------------------------------|--------------|
| Dhillon et al. (2011)       | In-depth interview             | Web-based telehealth system, no training provided                                       | Unrestricted (reported use: daily use of the system) | Loneliness, socialization                                | NA                                                                                   | Social support via Facebook-like features and networked games that trigger social interactions could reduce loneliness, motivate each other, and share experiences                                                                 | NA           |
| Fokkema & Kinscheer (2007)  | Cohort study w/a control group | Internet-at-home, 5 lessons of 2-hour training at home                                  | Unrestricted for 3 years                             | Loneliness                                               | de Jong-Gierveld & Kamphuis (1985) Loneliness Scale                                  | Loneliness reduction after 2 years ( $P = .050$ ) and 3 years ( $P = .02$ ) of intervention<br>Significant loneliness decrease among the well-educated elderly in 2 years ( $P = .04$ ) and 3 years ( $P = .008$ ) of intervention | Weak         |
|                             | In-depth interview             |                                                                                         |                                                      | Effect of ICT on loneliness & its cause                  | NA                                                                                   | 3 mechanisms of ICT to cope with loneliness                                                                                                                                                                                        | NA           |
| Heo et al. (2015)           | Cross-sectional study          | Internet                                                                                | Unrestricted                                         | Social support, loneliness                               | Schuster et al. (1990) social support scale<br>Hughes et al. (2004) loneliness scale | Internet use led to social support ( $\beta = .096, t = 6.051, P < .001$ ) that reduced loneliness ( $\beta = -.139, t = -8.034, P < .001$ )                                                                                       | Moderate     |
| Kahlbaugh et al. (2011)     | RCT                            | Wii, no training provided                                                               | 1 hour/week for 10 weeks                             | Loneliness, affect, physical activity, life satisfaction | UCLALS                                                                               | Lower loneliness ( $P < .005$ ) in the Wii group compared with the control group                                                                                                                                                   | Strong       |
| Karimi & Neustaedter (2012) | In-depth interview             | Internet, mobile phones; social media (e.g. Facebook), video chat systems (e.g., Skype) | Unrestricted                                         | Social connectivity, loneliness, social isolation        | NA                                                                                   | Adaption to ICTs helped stay connected and reduce loneliness and social isolation                                                                                                                                                  | NA           |

Note. n.d. = not documented, NA = not applicable.

| Study (year)                | Research design                  | Intervention (ICT description)                                                         | Intervention usage                                    | Dependent variables                                                                        | Outcomes measures                               | ICT Impacts on outcomes and effect sizes                                                                                                                                                                                                                     | EPHPP rating |
|-----------------------------|----------------------------------|----------------------------------------------------------------------------------------|-------------------------------------------------------|--------------------------------------------------------------------------------------------|-------------------------------------------------|--------------------------------------------------------------------------------------------------------------------------------------------------------------------------------------------------------------------------------------------------------------|--------------|
| Khvorostianov et al. (2011) | In-depth interview               | Internet                                                                               | Unrestricted                                          | Social isolation, loneliness                                                               | NA                                              | Elderly immigrants used Internet to maintain existing contacts and expand social networks that reduced their social isolation and loneliness. Internet use for entertainment and nurturing new hobbies also alleviated loneliness and hard feelings in life. | NA           |
| Machesney et al. (2014)     | Observation                      | Gerijoy (a virtual pet companion application), no training provided                    | Unrestricted, use length not documented               | Loneliness; depression cognition, self-esteem, quality of life                             | NA                                              | Reduced loneliness (no effect of other outcomes but life quality was reported)                                                                                                                                                                               | NA           |
| Mellor et al. (2008)        | Cohort study w/o a control group | Internet-at-home , individual training on a daily basis in the project's first 2 weeks | Unrestricted for 12 months                            | Social connectedness; Self-esteem, quality of life, positive affect                        | Social connectedness scale (Lee & Robins, 1995) | Social connectedness & self-esteem increased after 3 months but declined at the 6, 9, 12 months of Internet use; positive affect was up & down                                                                                                               | Weak         |
|                             | In-depth interview               |                                                                                        |                                                       | Internet use impact on social isolation; frequency, experience, & barriers of Internet use | NA                                              | Internet use had a positive impact on social connectedness                                                                                                                                                                                                   | NA           |
| Nahm et al. (2003)          | Cross-sectional study            | Internet-at-home                                                                       | Unrestricted (reported average use: 4.23 ± 0.9 years) | Social support, computer-mediated social networks, psychological well-being                | n.d.                                            | Usage of Internet & email and PC knowledge enlarged the participant's computer-mediated social networks (CMSN) that increased social support; age & physical barrier of PC use led to a smaller CMSN; no effect size reported                                | Weak         |
| Richardson et al. (2005)    | Focus-group interview            | Internet-at-home                                                                       | Unrestricted                                          | Social connectedness                                                                       | NA                                              | Elderly used computer to connect to others, to information, and to the modern world.                                                                                                                                                                         | NA           |

Note. n.d. = not documented, NA = not applicable.

| Study (year)             | Research design                | Intervention (ICT description)                                                                          | Intervention usage                                                                                                       | Dependent variables                                                                                                                         | Outcomes measures                                                                                   | ICT Impacts on outcomes and effect sizes                                                                                                                                                                                                                                                    | EPHPP rating |
|--------------------------|--------------------------------|---------------------------------------------------------------------------------------------------------|--------------------------------------------------------------------------------------------------------------------------|---------------------------------------------------------------------------------------------------------------------------------------------|-----------------------------------------------------------------------------------------------------|---------------------------------------------------------------------------------------------------------------------------------------------------------------------------------------------------------------------------------------------------------------------------------------------|--------------|
| Savolainen et al. (2008) | In-depth interview             | Videoconferencing system                                                                                | Unrestricted (reported average use: 5.7 initiated calls & 40 minutes of call time per month)                             | Loneliness                                                                                                                                  | NA                                                                                                  | 7 out of the 8 participants reported a positive impact on loneliness                                                                                                                                                                                                                        | NA           |
| Shapira et al. (2007)    | Cohort study w/a control group | Internet at nursing homes, 1 or 2 1-hour training sessions for 15 weeks (training format not specified) | Unrestricted for 15 weeks                                                                                                | Loneliness; depression, life satisfaction, self-control, physical functioning (PF)                                                          | Revised UCLALS, depressive objective checklist                                                      | Loneliness was significantly lower in the Internet group compared with the control group [ $F(1, 33) = 34.71, P < .001, \eta^2 = .051$ ], effect on other outcomes was sig. but not on PF                                                                                                   | Moderate     |
|                          | In-depth interview             |                                                                                                         |                                                                                                                          | Dynamics of the tested variables                                                                                                            | NA                                                                                                  | Learning of ICT, social benefits of online communication, involvement & action, positive feelings by ICT use                                                                                                                                                                                | NA           |
| Slegers et al. (2008)    | RCT                            | Internet-at-home, three 4-hour group training sessions for 2 weeks                                      | Unrestricted, use length not documented                                                                                  | Social wellbeing, emotional wellbeing, physical wellbeing, belief in external control, control over life, instrumental activities of living | Loneliness questionnaire (de Jong-Gierveld & Kamphuis, 1986), nature & frequency of social networks | No significant effects found                                                                                                                                                                                                                                                                | Strong       |
| Sum et al. (2008)        | Cross-sectional study          | Internet-at-home                                                                                        | Unrestricted (reported use: 96.8% of the participants used Internet for more than a year, and 44% for more than 7 years) | Loneliness                                                                                                                                  | Social and Emotional Loneliness Scale (SELSA)                                                       | Using Internet for communication led to lower social loneliness ( $\beta = -.124, P = .002$ ). Internet usage for new contacts led to family loneliness ( $\beta = .145, P = .005$ ); long Internet usage time was also positively linked to social loneliness ( $\beta = .151, P = .002$ ) | Weak         |

Note. n.d. = not documented, NA = not applicable.

| Study (year)       | Research design                     | Intervention (ICT description)                                                                                                        | Intervention usage         | Dependent variables                    | Outcomes measures                                                                                  | ICT Impacts on outcomes and effect sizes                                                                                                                                                                                                                                                                                                                      | EPHPP rating |
|--------------------|-------------------------------------|---------------------------------------------------------------------------------------------------------------------------------------|----------------------------|----------------------------------------|----------------------------------------------------------------------------------------------------|---------------------------------------------------------------------------------------------------------------------------------------------------------------------------------------------------------------------------------------------------------------------------------------------------------------------------------------------------------------|--------------|
| Torp et al. (2008) | Cohort study w/o a control group    | PC with internet & online discussion forum, three 3-hour group training sessions over 3 weeks                                         | Unrestricted for 12 months | Social contact, social support         | Family and Friendship Contacts Scale (Andersson, 1984), Russell et al. (1980) social support scale | ICT use increased social contacts [Change M = 1.5, CI for mean (0.06-2.88), $P = .04$ ] and social support [Change M = 3.4, CI for mean (1.14-5.61), $P = .010$ ]                                                                                                                                                                                             | Weak         |
|                    | Focus-group interview (at 7 months) |                                                                                                                                       |                            |                                        | NA                                                                                                 | ICT use most facilitated contacts with grandchildren. It also led to better mood, new and supportive friends with same experience, and away from cared-for-person. Negative outcomes: much time spent on ICT                                                                                                                                                  | NA           |
| Tsai et al. (2010) | RCT                                 | Videoconferencing interaction, a trained research assistant spent at least 5 minute per week with each participant at the time of use | Once a week for 3 months   | Social support, loneliness, depression | Social support behavior scale (Hsiung, 1999), UCLALS, Geriatric Depression Scale                   | Emotional & appraisal social support was higher in the intervention group at 1 week ( $\beta = .42$ , $P < .001$ ; $\beta = .39$ , $P = .001$ ) & 3 months ( $\beta = .61$ , $p < .001$ ; $\beta = .68$ , $P < .001$ ); loneliness was lower in the intervention group at 1 week ( $\beta = -1.21$ , $P = .002$ ) & 3 months ( $\beta = -2.84$ , $P = .003$ ) | Strong       |

Note. n.d. = not documented, NA = not applicable.

| Study (year)           | Research design       | Intervention (ICT description)                                     | Intervention usage        | Dependent variables                                                                                    | Outcomes measures                                                                                                                     | ICT Impacts on outcomes and effect sizes                                                                                                                                                 | EPHPP rating |
|------------------------|-----------------------|--------------------------------------------------------------------|---------------------------|--------------------------------------------------------------------------------------------------------|---------------------------------------------------------------------------------------------------------------------------------------|------------------------------------------------------------------------------------------------------------------------------------------------------------------------------------------|--------------|
| White et al. (2002)    | RCT                   | Internet-at-home, 9 hours of group training                        | Unrestricted for 5 months | Loneliness, depression, perceived control, attitude toward computer, life satisfaction, confidant size | UCLALS, the CES Depression Scale, Perceived Control Scale, Attitudes Toward Computers Scale, life satisfaction , number of confidants | No significant effects found (only a trend of less loneliness, less depression, and more number of confidants)                                                                           | Strong       |
|                        | Observation           |                                                                    |                           | Goals, difficulties, challenges, and benefits of computer use                                          |                                                                                                                                       | Positive impact of computer use on reducing loneliness, depression & boredom in life; such use was a rewarding challenge                                                                 | NA           |
| Winstead et al. (2012) | Focus-group interview | Internet at AICs, 29 hours of group training sessions over 8 weeks | Unrestricted for 8 weeks  | Social networks, familial communication                                                                | NA                                                                                                                                    | ICT use led to the online-community participation, renewed prior relationships, and enlarged familial communication of AIC residents. But the effect size varied by AIC characteristics. | NA           |

Note. n.d. = not documented, NA = not applicable.
